# Supplementary material for: Topical Glycopyrronium Tosylate for the Treatment of Primary Axillary Hyperhidrosis: Patient-Reported Outcomes from the ATMOS-1 and ATMOS-2 Phase III Randomized Controlled Trials
Source: PubMed Central journal article supplement — Am J Clin Dermatol. 2018 Oct 30;20(1):135–45. doi: 10.1007/s40257-018-0395-0 (PMC6516143; doi:10.1007/s40257-018-0395-0), 2018-10-30

Supplemental Fig. 1 Study Design for ATMOS-1 and ATMOS-2 Trials

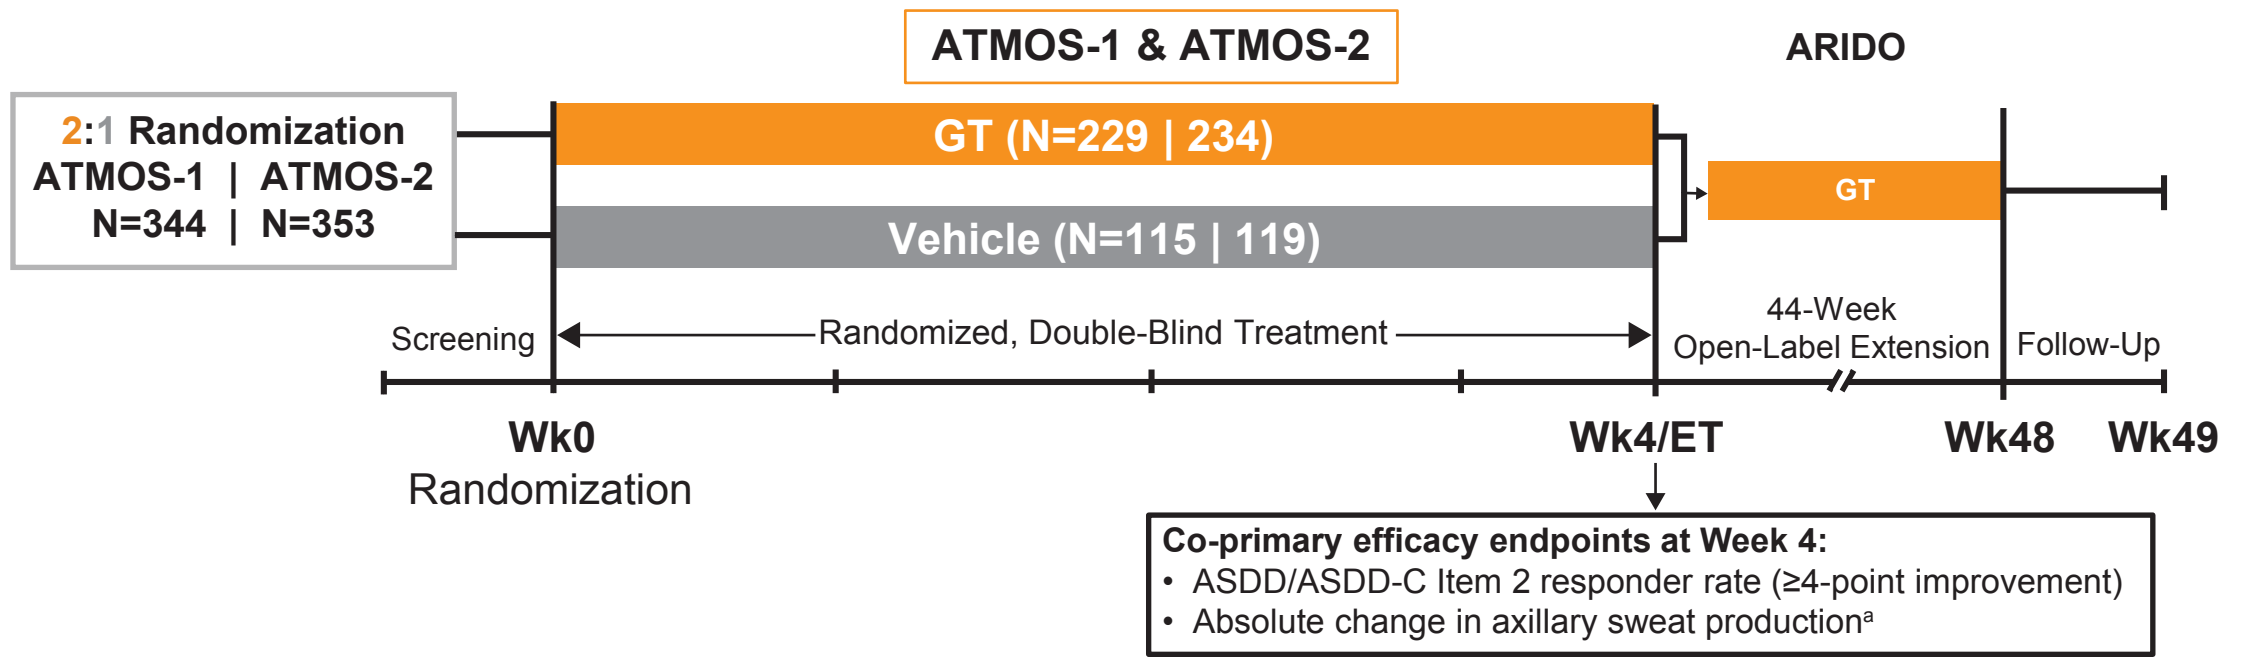

For subjects not enrolling in ARIDO, telephone follow-up occurred in Week 5 to record adverse events and concomitant medications.

<sup>a</sup>Gravimetrically-measured. ET, end of treatment for ATMOS-1 and ATMOS-2; GT, glycopyrronium tosylate; Wk, Week

Supplemental Fig. 2 ASDD Items 2, 3, and 4 at Baseline: Proportion of Patients at Different Threshold Score Cutoffs (Pooled Population)

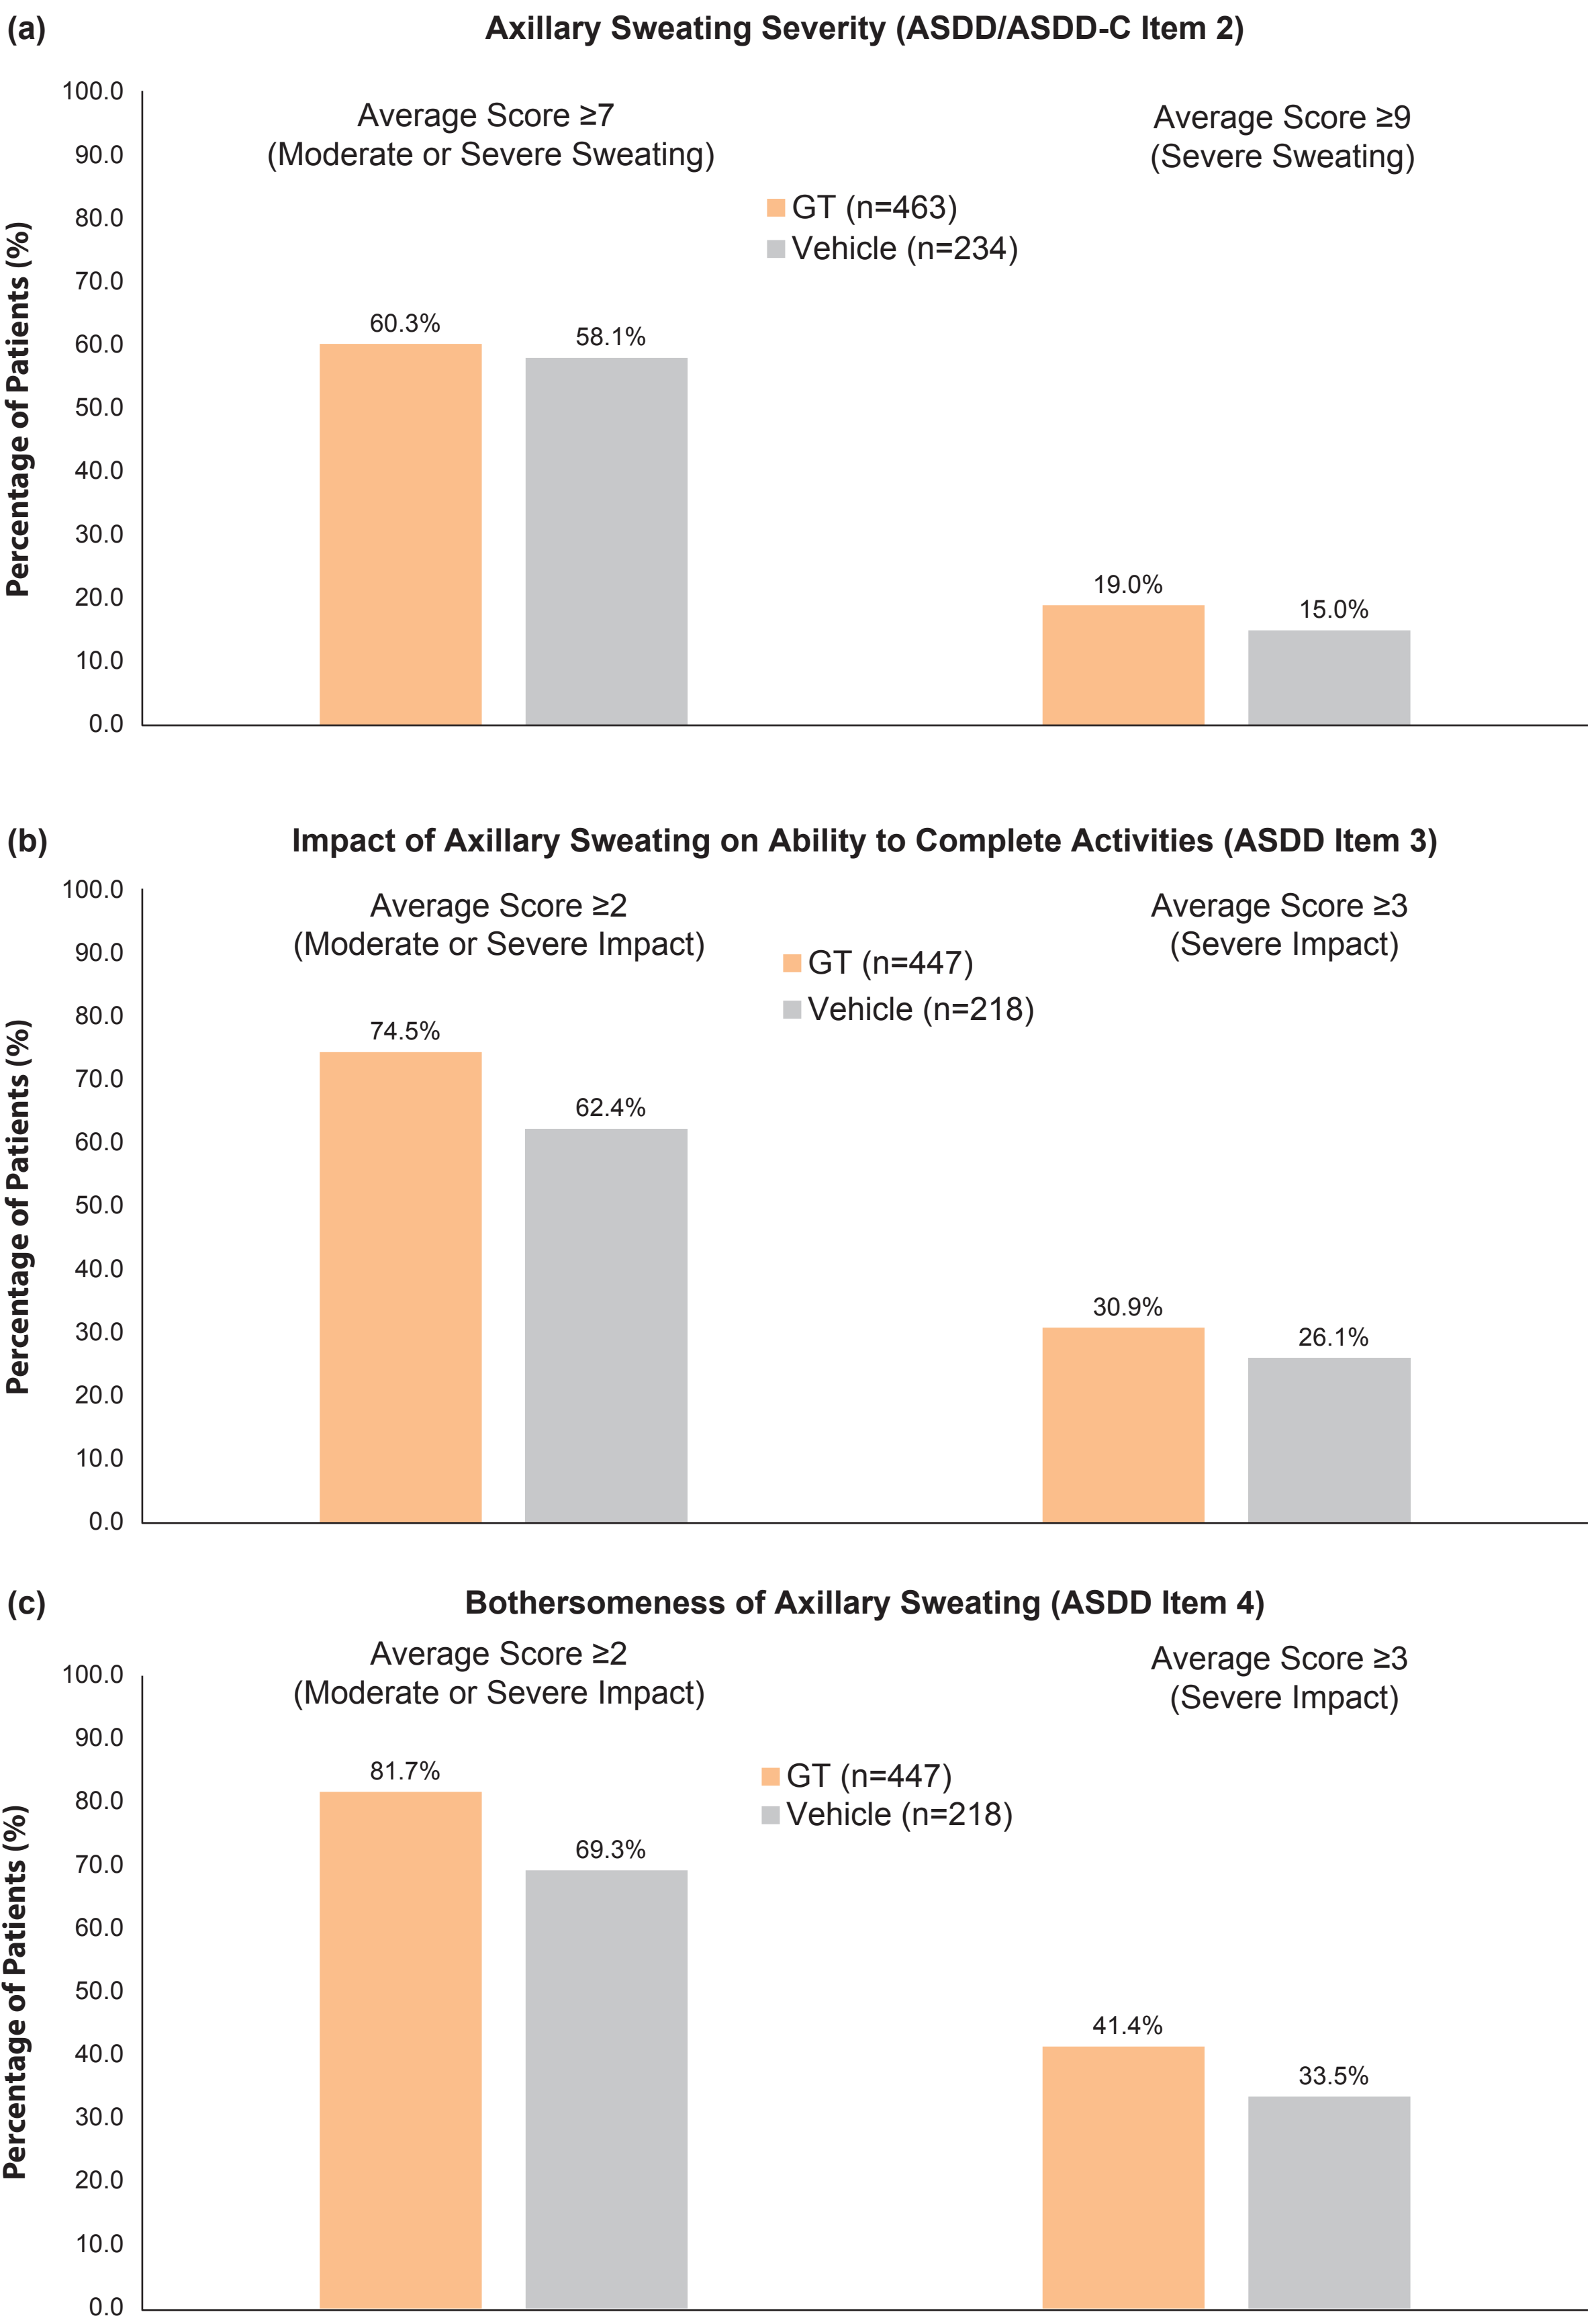

Supplement: 40257_2018_395_MOESM1_ESM.pdf [file 40257_2018_395_MOESM1_ESM.pdf]
